# Supplementary material for: Azadirachtin-based formulation in combination with mesoporous silica materials as a plague control agent
Source: Royal Society of Chemistry journal article supplement (doi:10.1039/d5nj00431d), 2025-01-01
Supplement: d5nj00431d1.pdf [file d5nj00431d1.pdf]

## SUPPLEMENTARY INFORMATION

### Azadirachtin based formulation in combination with mesoporous silica materials as plague control agent.

Míriam Benítez,<sup>a</sup> Jamal El Haskouri,<sup>b</sup> Carlos Montesinos,<sup>c</sup> Pedro Amorós,<sup>\*b</sup> José Vicente Ros-Lis<sup>\*a</sup>

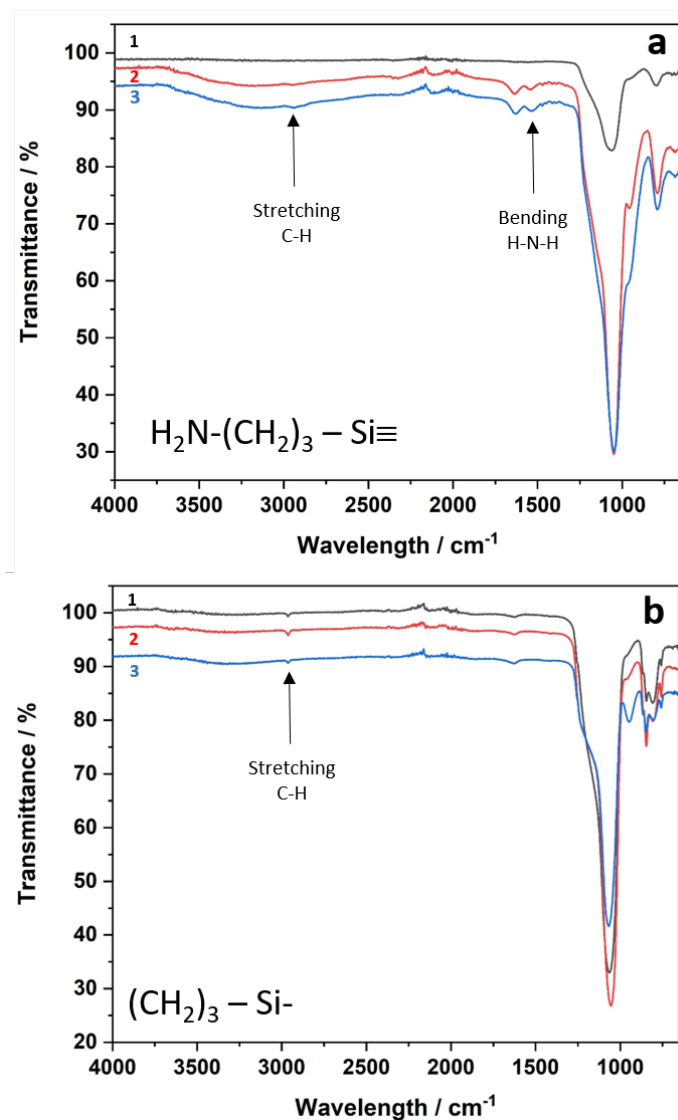

Figure S1.- FTIR spectra of silica supports functionalized with (a) APTES and (b) ClSiMe<sub>3</sub>. (1) FS, (2) UVM-7 and (3) Ti-UVM-7.
